# Supplementary material for: A facile synthesis of nanostructured CoFe2O4 for the electrochemical sensing of bisphenol A
Source: Royal Society of Chemistry journal article supplement (doi:10.1039/c9ra10936f), 2020-01-01
Supplement: c9ra10936f1.pdf [file c9ra10936f1.pdf]

## Supporting information

### **A facile synthesis of nanostructured $\text{CoFe}_2\text{O}_4$ for the electrochemical sensing of bisphenol A**

Qin Liu,<sup>a</sup> XiaoZhi Kang,<sup>a</sup> LanZhi Xing,<sup>a</sup> ZhiXiang Ye<sup>a</sup> and YingChun Yang<sup>a\*</sup>

<sup>a</sup>College of Resources and Environment, Chengdu University of Information Technology, Chengdu 610225, Sichuan, China.

\*Corresponding authors. E-mails: yangyingchun@cuit.edu.cn.

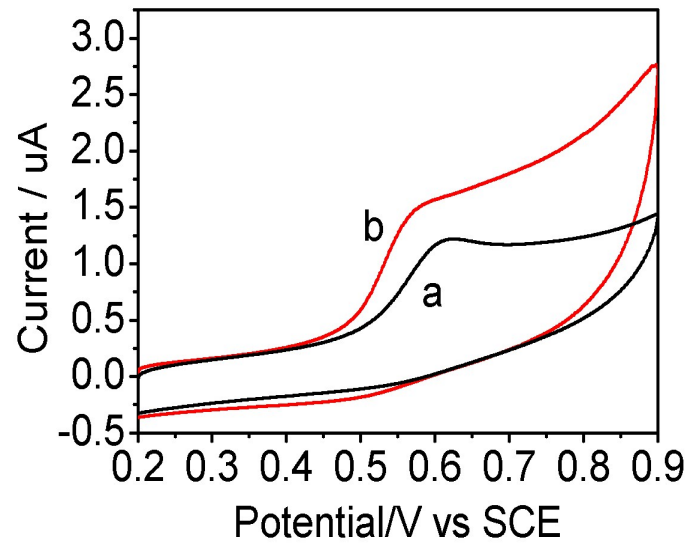

**Figure S1.** CVs of  $1.0 \times 10^{-5}$  mol L<sup>-1</sup> BPA at a bare GCE (a), CoFe<sub>2</sub>O<sub>4</sub>/GCE (b) in 0.01 M PBS (pH 7.0) with the scan rate of 50 mV/s.

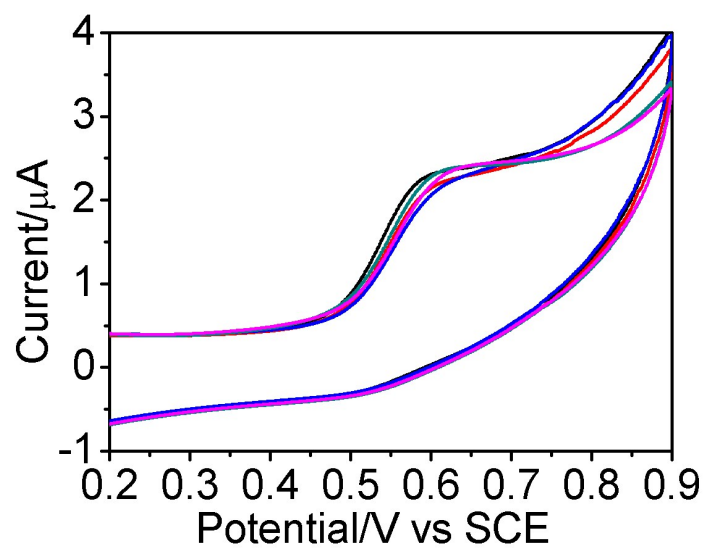

**Figure S2.** The reproducibility curves of  $1.0 \times 10^{-5} \text{ mol L}^{-1}$  BPA on  $\text{CoFe}_2\text{O}_4 / \text{GCE}$ .

**Table S1.** Comparison of the electrocatalytic performance of different modified electrodes for the determination of BPA.

| Modified electrode                                         | Linear range ( $\mu\text{M}$ ) | Detection limit ( $\mu\text{M}$ ) | Recovery (%)  | References |
|------------------------------------------------------------|--------------------------------|-----------------------------------|---------------|------------|
| CS/MNPs-rGO/GCE                                            | 0.06-11                        | 0.0167                            | 97.0-109.2 %  | 1          |
| MWCNT-Li <sub>4</sub> Ti <sub>5</sub> O <sub>12</sub> /GCE | 0.1-10                         | 0.078                             | 97.8-106.3 %  | 2          |
| MWCNTs/GCE                                                 | 4.5-82.5                       | 0.08                              | -             | 3          |
| CuMOF-Tyr-Chit/GCE                                         | 0.05-3                         | 0.013                             | 94.0-101.6 %  | 4          |
| ZnTsPc/f-GN/GCE                                            | 0.05-4                         | 0.02                              | 96.8-103.6 %  | 5          |
| FeOx- $\beta$ CD/GCE                                       | 0.1-50                         | 0.5                               | -             | 6          |
| PAMAM-Fe <sub>3</sub> O <sub>4</sub> /GCE                  | 0.01-3.07                      | 0.005                             | 95.3-104.0 %  | 7          |
| MM P NP-CTAB/CPE                                           | 0.1-100                        | 0.1                               | 95.0-112.0 %  | 8          |
| CoFe <sub>2</sub> O <sub>4</sub> /GCE                      | 0.05-10                        | 0.0036                            | 95.5%-102.0 % | This work  |

**Table S2.** The effect of different interferences at CoFe<sub>2</sub>O<sub>4</sub> / GCE in the determination of BPA.

| Interference                 | Concentration (mol L <sup>-1</sup> ) | Peak change (%) |
|------------------------------|--------------------------------------|-----------------|
| K                            | 1 $\times$ 10 <sup>-3</sup>          | 4.27            |
| Na                           | 1 $\times$ 10 <sup>-3</sup>          | 3.39            |
| Ca <sup>2+</sup>             | 1 $\times$ 10 <sup>-3</sup>          | 2.55            |
| Mg <sup>2+</sup>             | 1 $\times$ 10 <sup>-3</sup>          | 4.58            |
| Zn <sup>2+</sup>             | 1 $\times$ 10 <sup>-3</sup>          | 2.70            |
| NO <sub>3</sub> <sup>-</sup> | 1 $\times$ 10 <sup>-3</sup>          | 3.29            |
| 2-nitrophenol                | 1 $\times$ 10 <sup>-4</sup>          | -1.78           |
| 4-nitrophenol                | 1 $\times$ 10 <sup>-4</sup>          | 1.95            |
| 2,4-dinitrophenol            | 1 $\times$ 10 <sup>-4</sup>          | 4.40            |
| resorcinol                   | 1 $\times$ 10 <sup>-4</sup>          | 3.61            |
| glucose                      | 1 $\times$ 10 <sup>-4</sup>          | 3.57            |

## Reference

1. Y. Zhang, Y. Cheng, Y. Zhou, B. Li, W. Gu, X. Shi and Y. Xian, Electrochemical sensor for bisphenol A based on magnetic nanoparticles decorated reduced graphene oxide, *Talanta*, 2013, **107**, 211-218.
2. W. Wang, X. Yang, Y.-x. Gu, C.-f. Ding and J. Wan, Preparation and properties of bisphenol A sensor based on multiwalled carbon nanotubes/Li<sub>4</sub>Ti<sub>5</sub>O<sub>12</sub>-modified electrode, *Ionics*, 2014, **21**, 885-893.
3. L. A. Goulart, F. C. de Moraes and L. H. Mascaro, Influence of the different carbon nanotubes on the development of electrochemical sensors for bisphenol A, *Mater Sci Eng C Mater Biol Appl*, 2016, **58**, 768-773.
4. X. Wang, X. Lu, L. Wu and J. Chen, 3D metal-organic framework as highly efficient biosensing platform for ultrasensitive and rapid detection of bisphenol A, *Biosens Bioelectron*, 2015, **65**, 295-301.
5. K. Hou, L. Huang, Y. Qi, C. Huang, H. Pan and M. Du, A bisphenol A sensor based on novel self-assembly of zinc phthalocyanine tetrasulfonic acid-functionalized graphene nanocomposites, *Mater Sci Eng C Mater Biol Appl*, 2015, **49**, 640-647.
6. M. Masikini, T. T. Waryo, P. G. L. Baker, L. V. Ngqongwa, A. R. Williams and E. I. Iwuoha, Hydroxy-Iron/ $\beta$ -cyclodextrin-Film Amperometric Sensor for the Endocrine Disruptor Substance Bisphenol-A in an Aqueous Medium with Reduced Fouling Effects, *Analytical Letters*, 2011, **44**, 2047-2060.

7. H. Yin, L. Cui, Q. Chen, W. Shi, S. Ai, L. Zhu and L. Lu, Amperometric determination of bisphenol A in milk using PAMAM-Fe<sub>3</sub>O<sub>4</sub> modified glassy carbon electrode, *Food Chemistry*, 2011, **125**, 1097-1103.
8. L. Zhu, Y. Cao and G. Cao, Electrochemical sensor based on magnetic molecularly imprinted nanoparticles at surfactant modified magnetic electrode for determination of bisphenol A, *Biosens Bioelectron*, 2014, **54**, 258-261.
